# Supplementary material
Source: PubMed Central journal article supplement (PMC4418506)

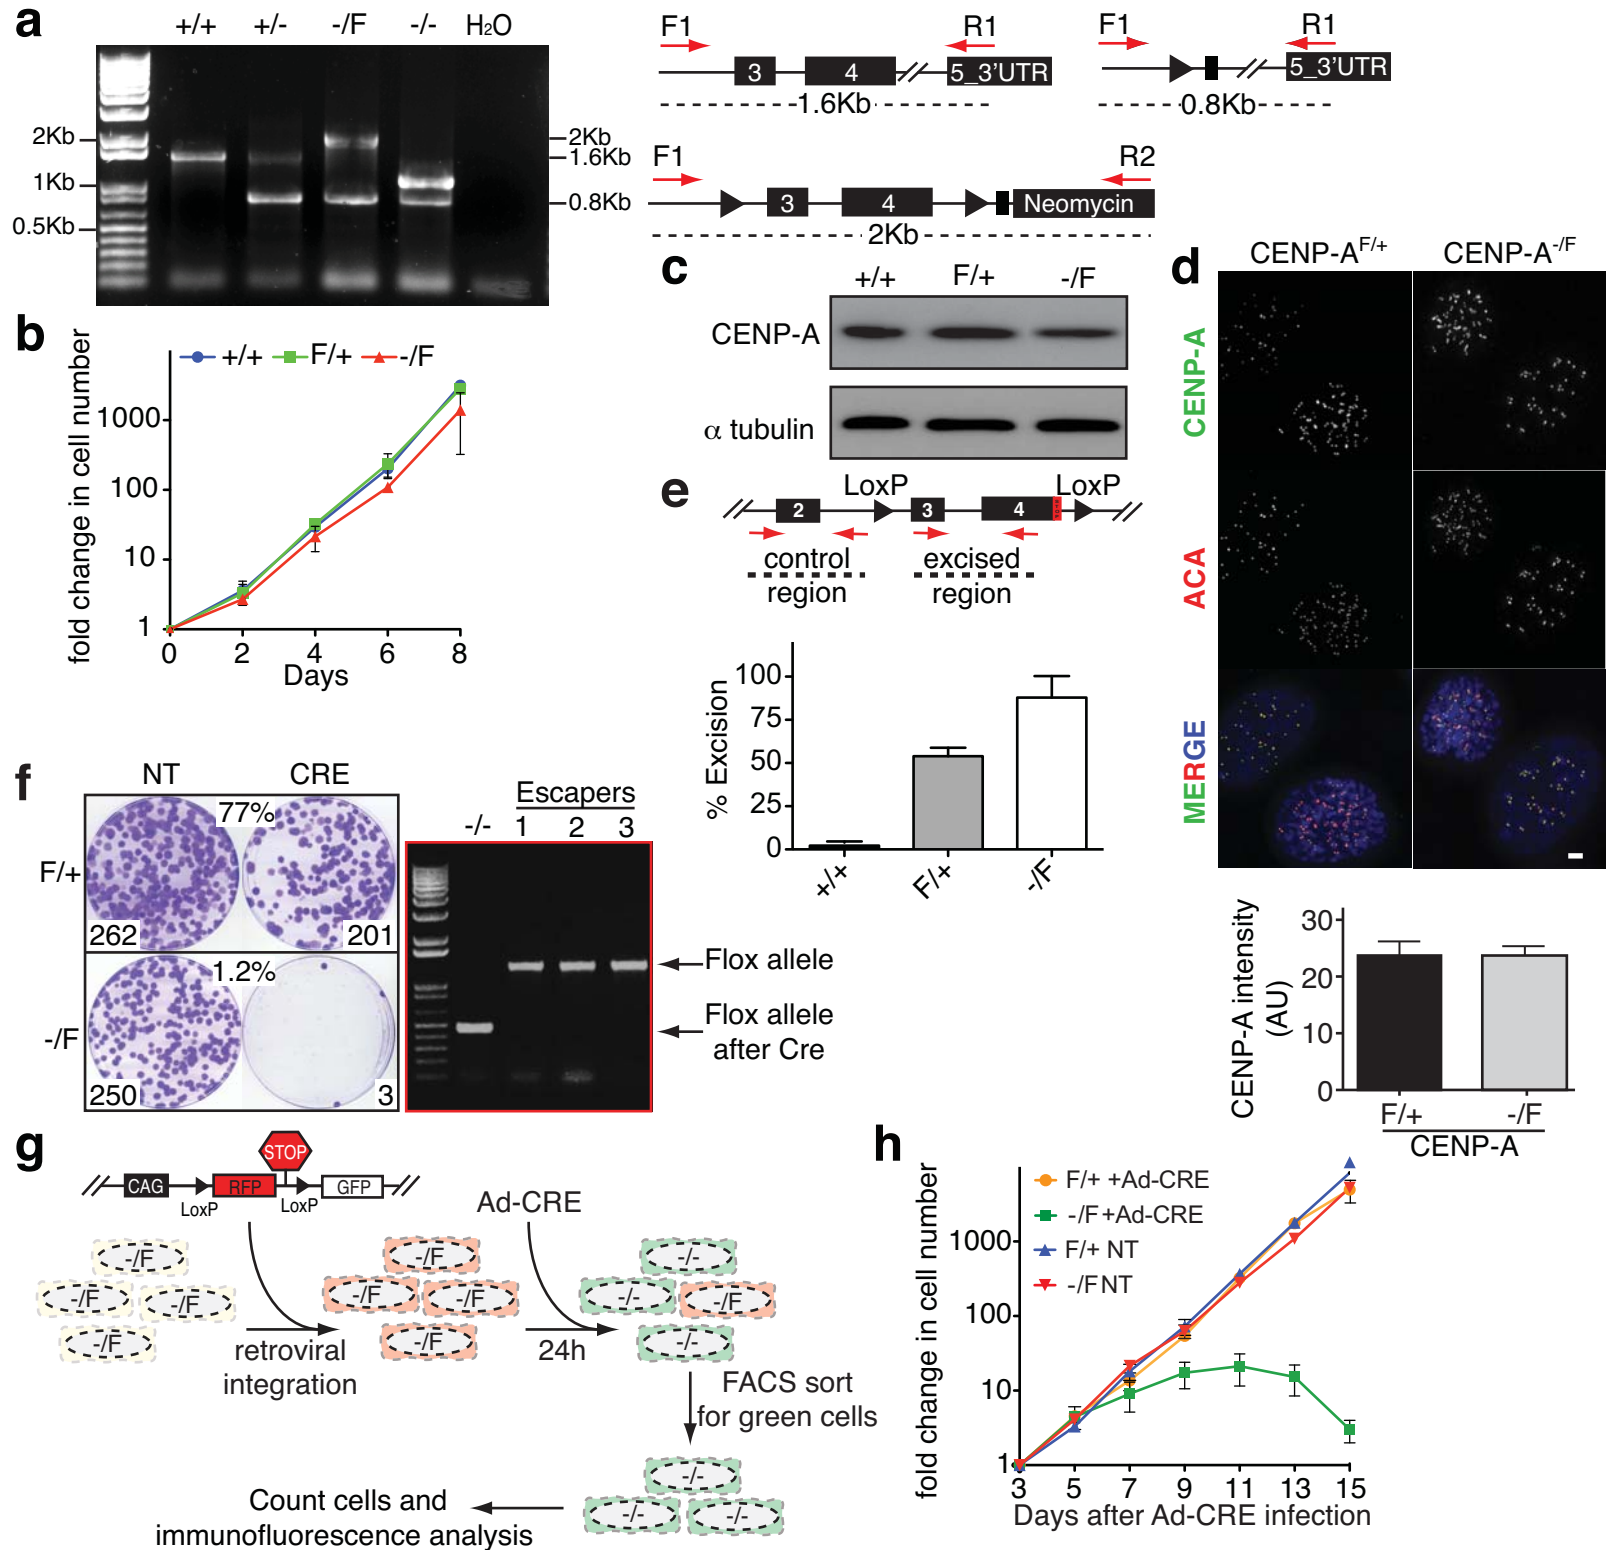

**Supplementary figure S1**

**a**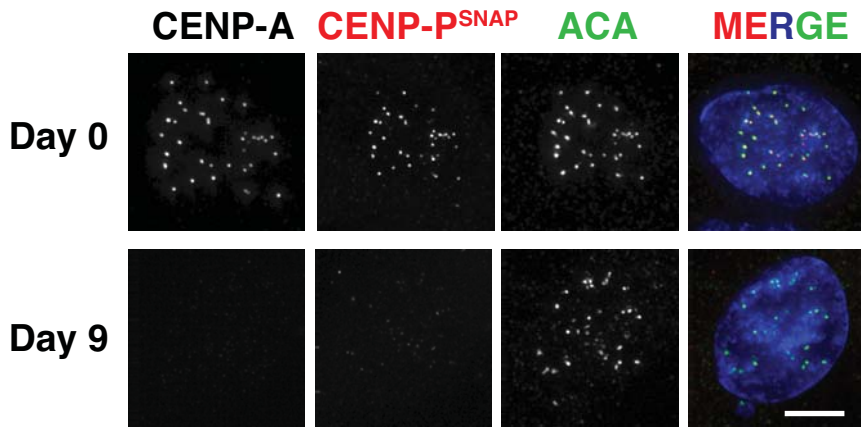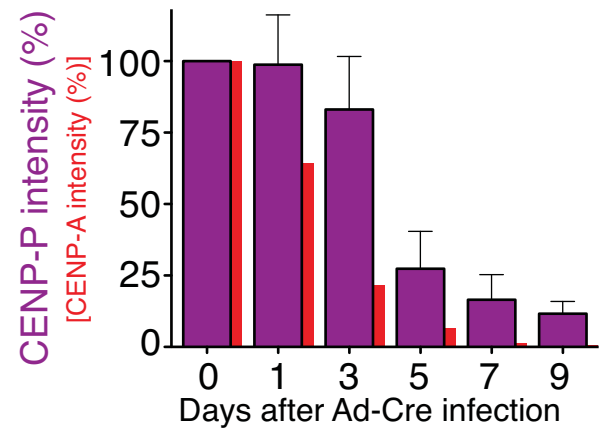**b**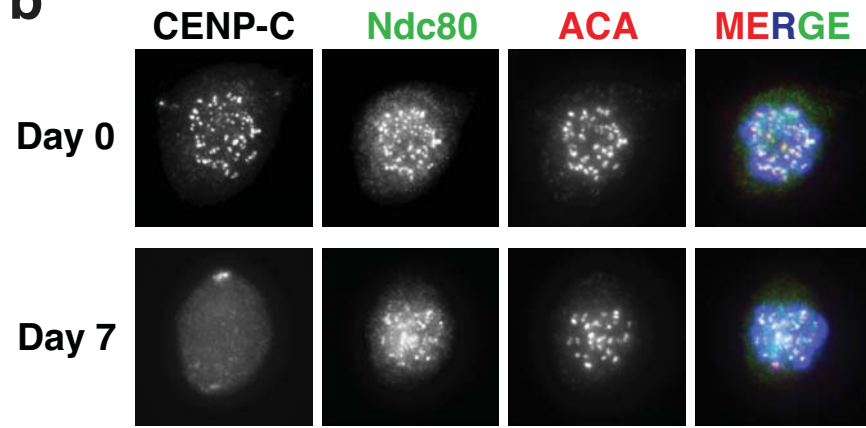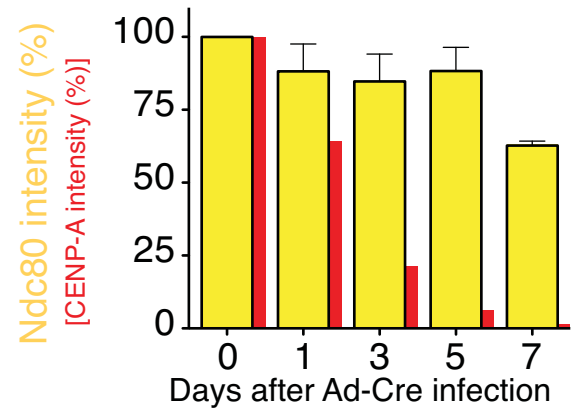**c**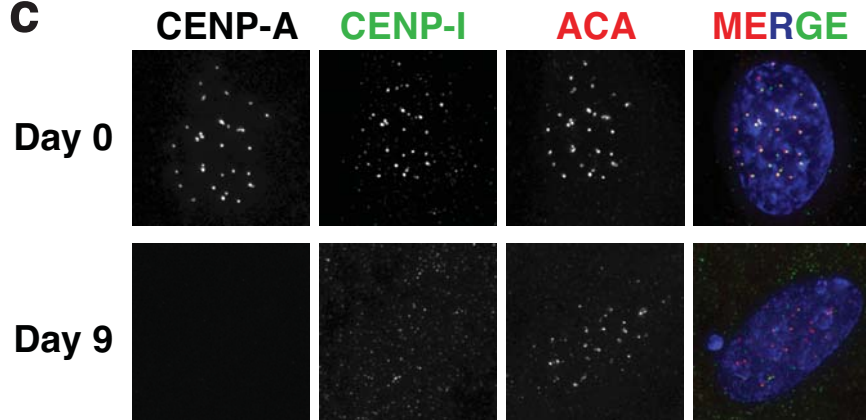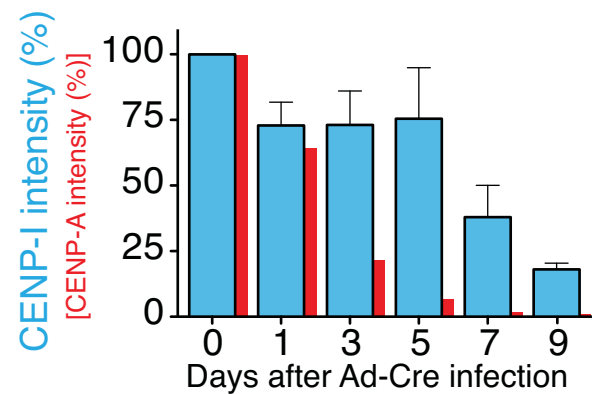**Supplementary figure S2**

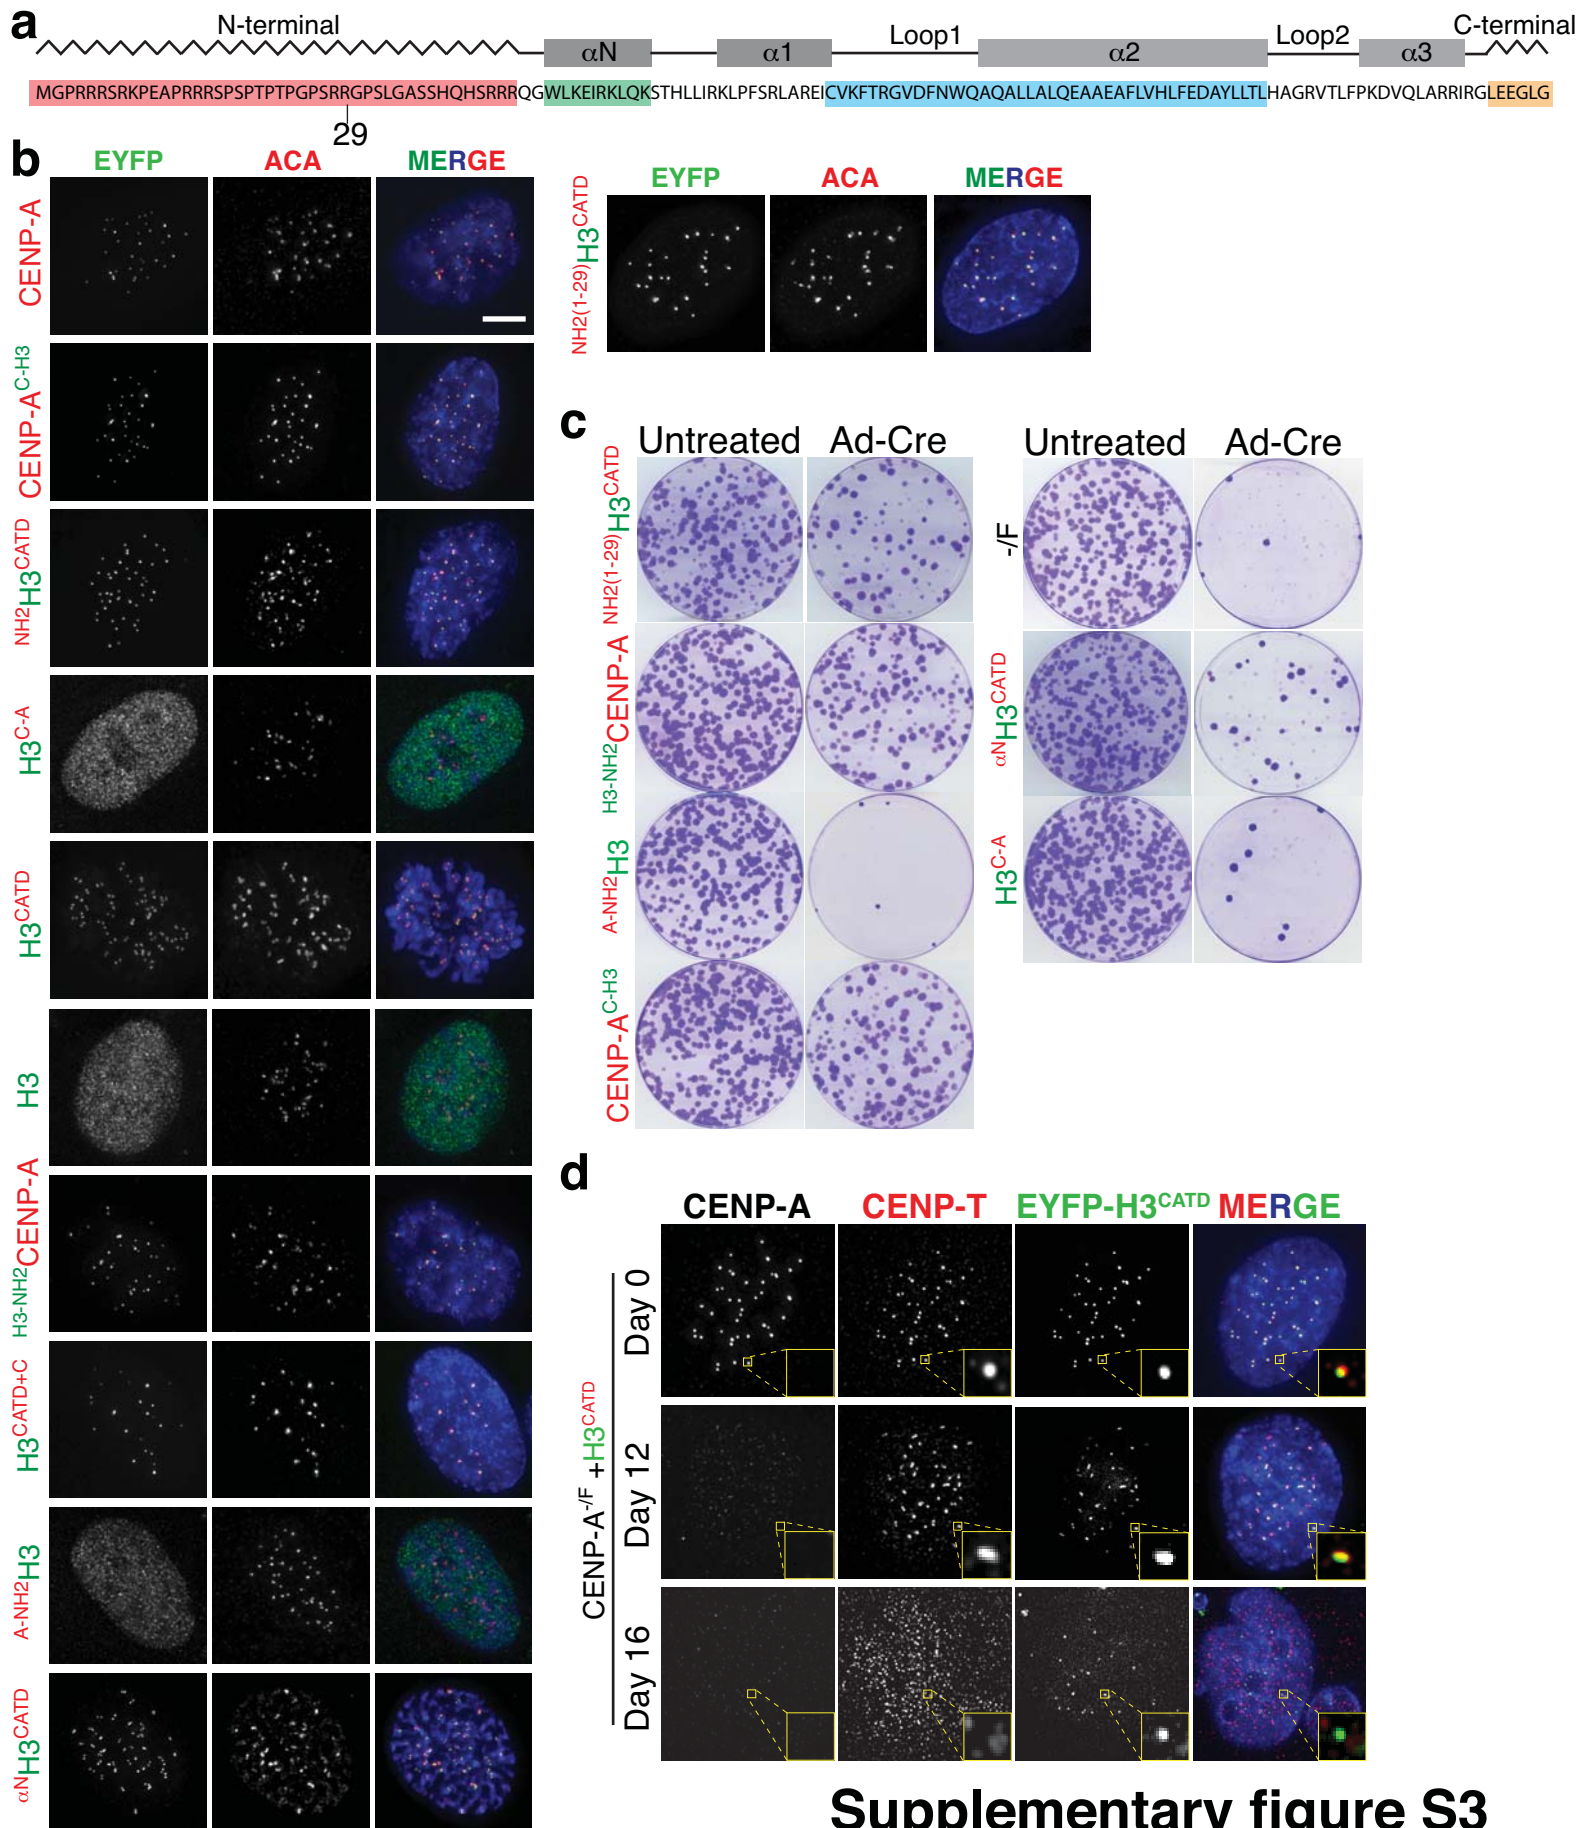

Supplementary figure S3



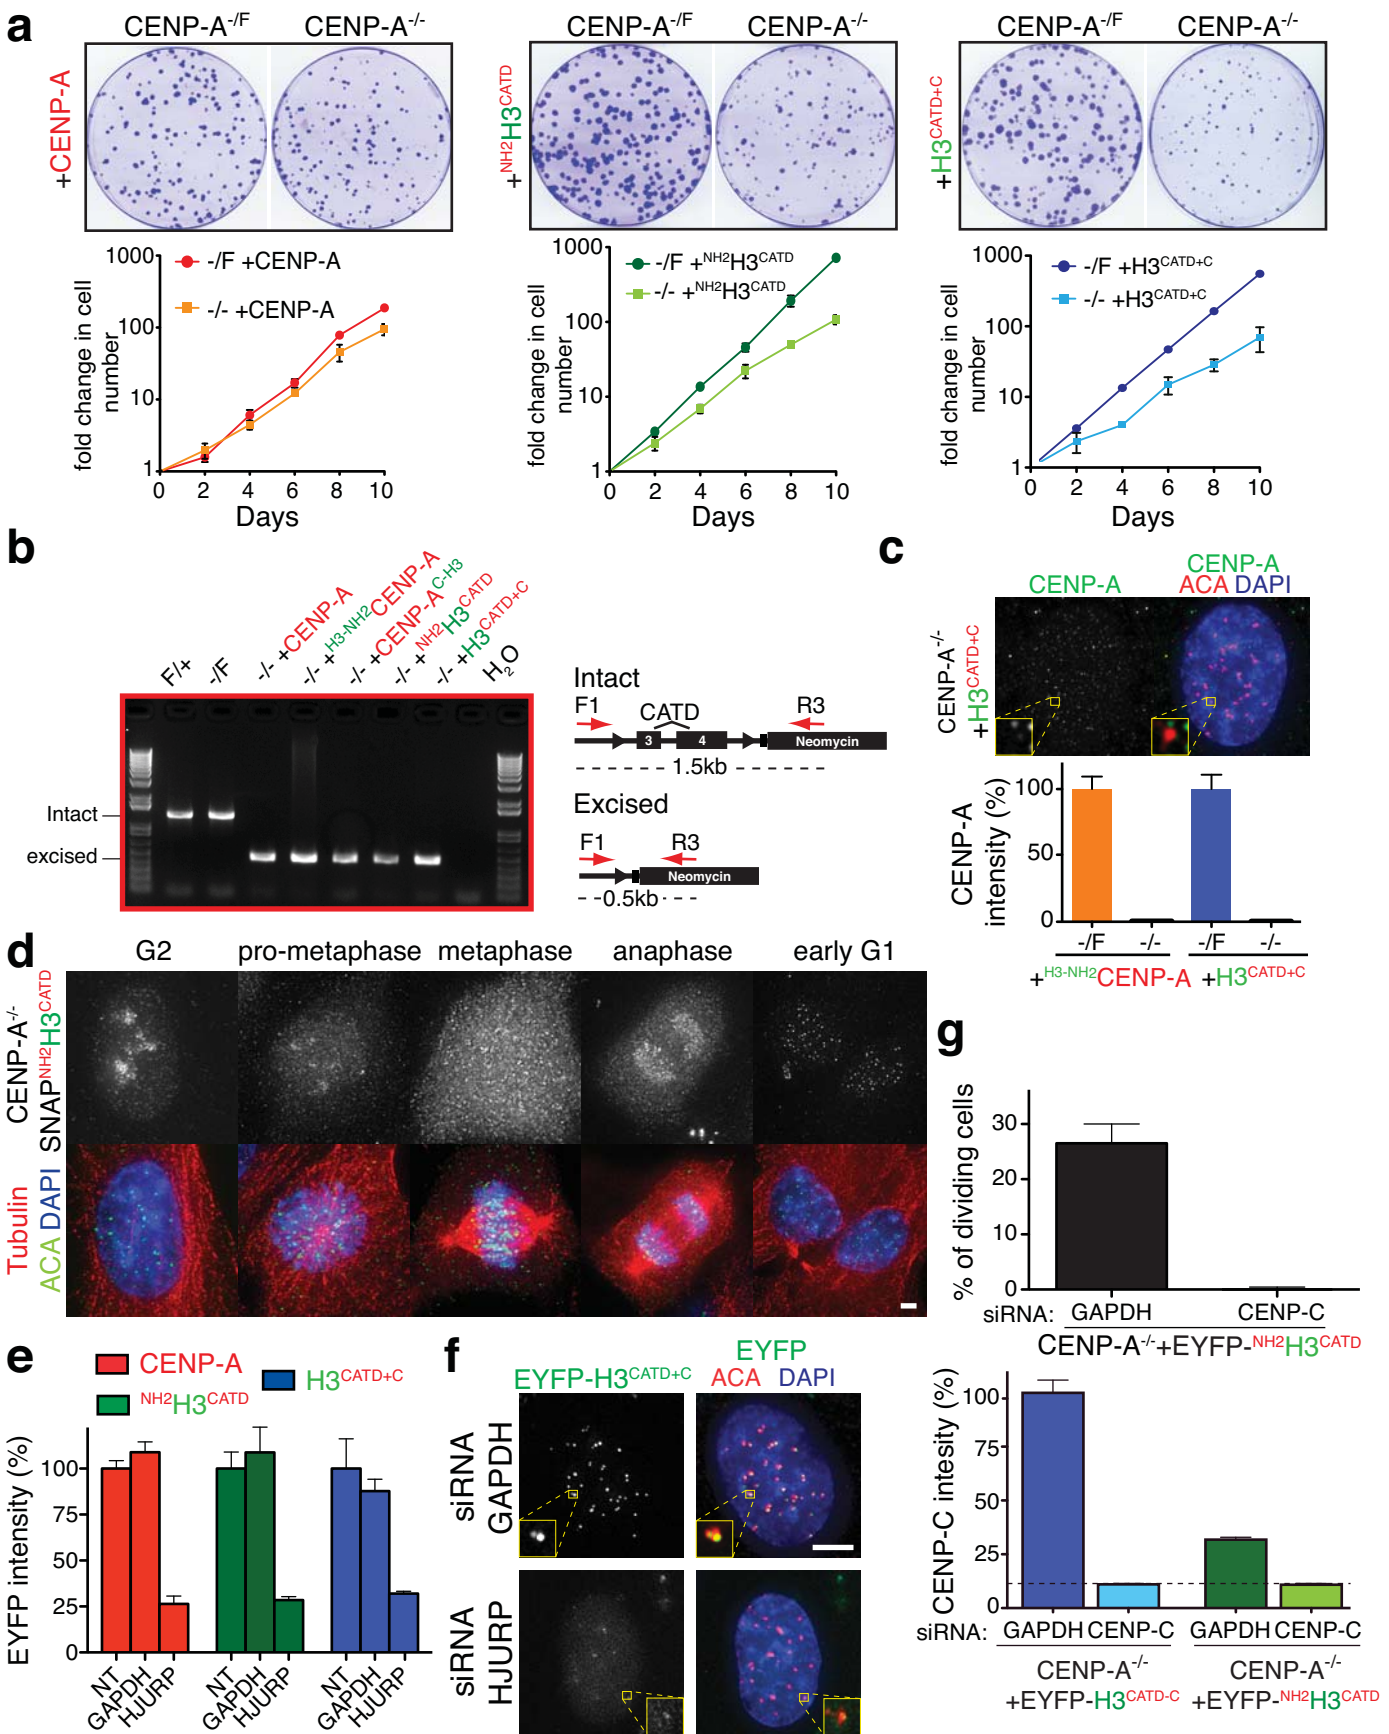

Supplementary figure S4

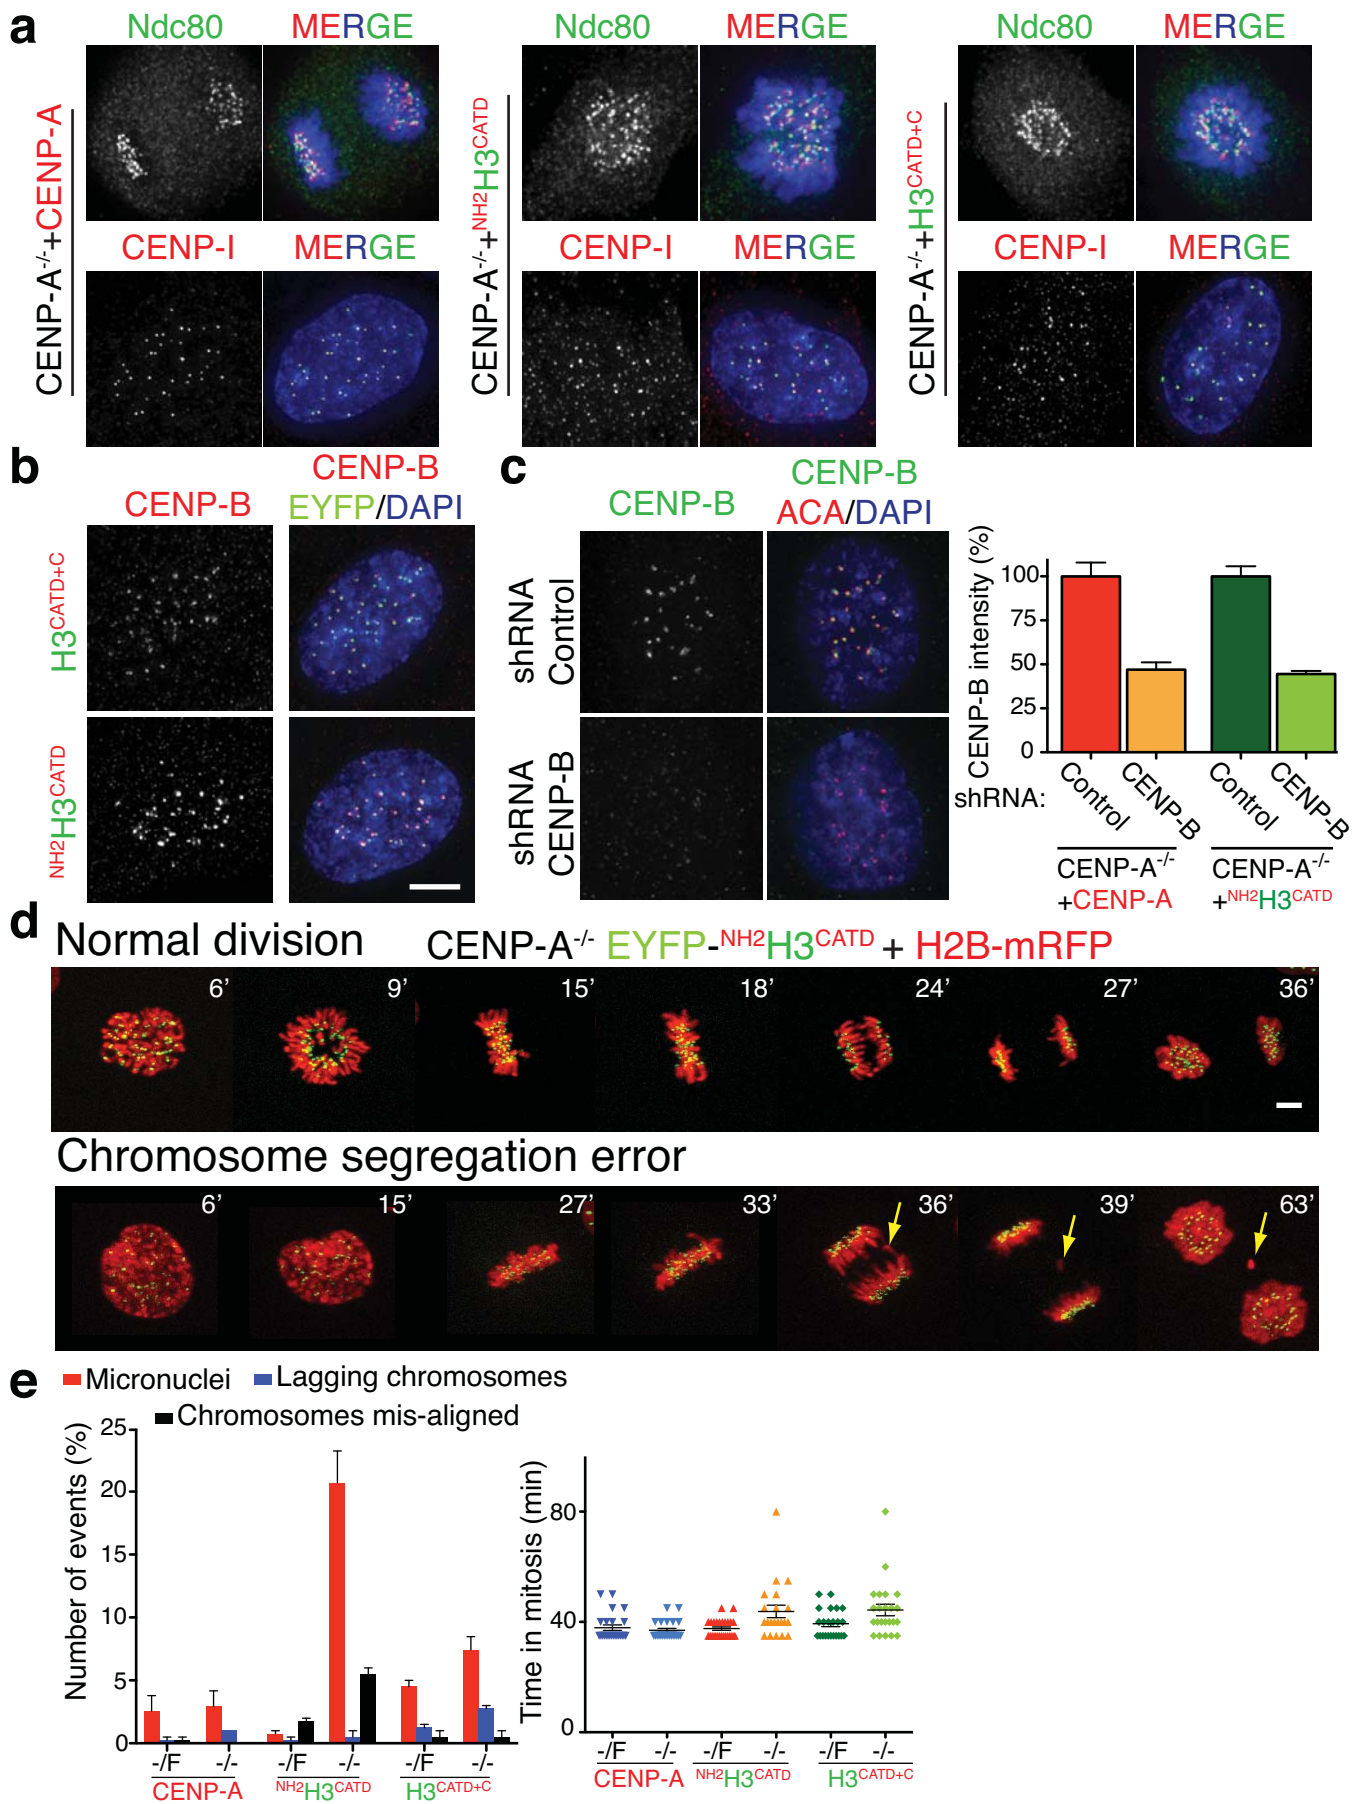

Supplementary figure S5

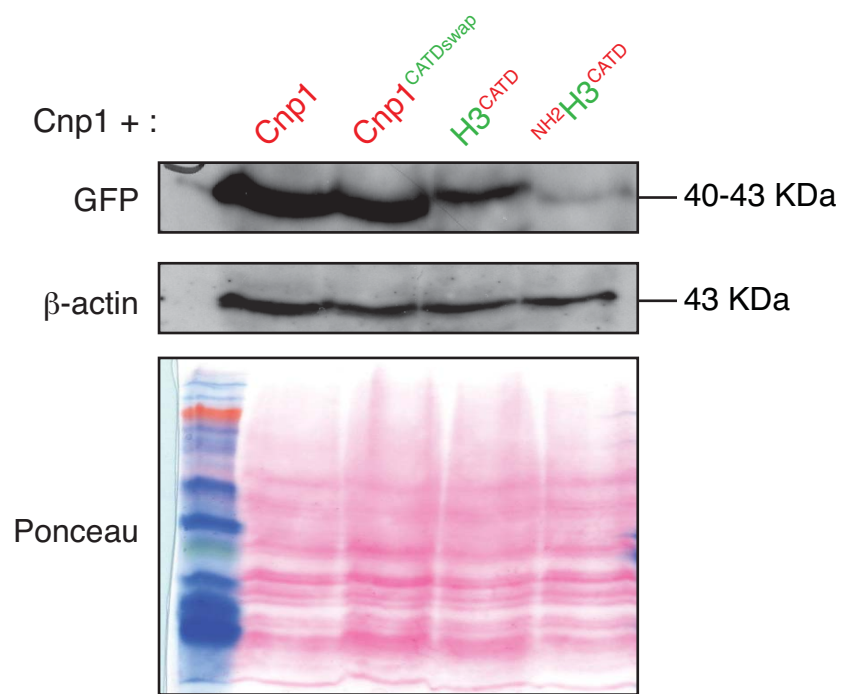

**Supplementary figure S6**

Figure 1c

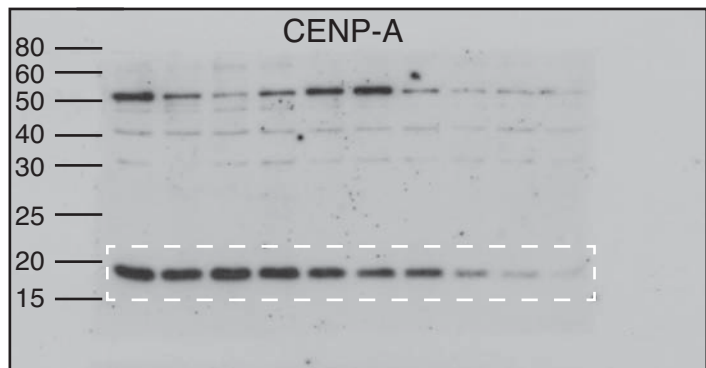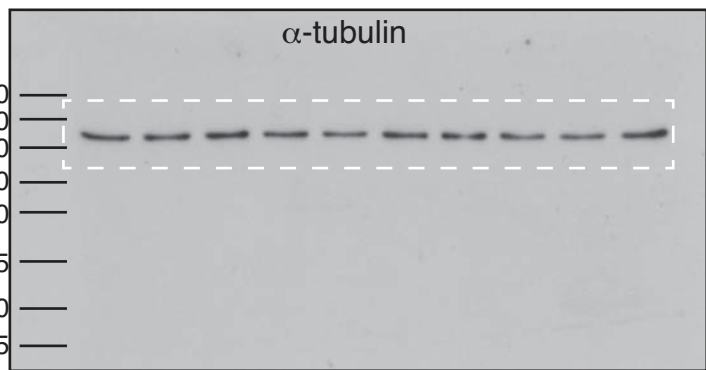

Figure 3c

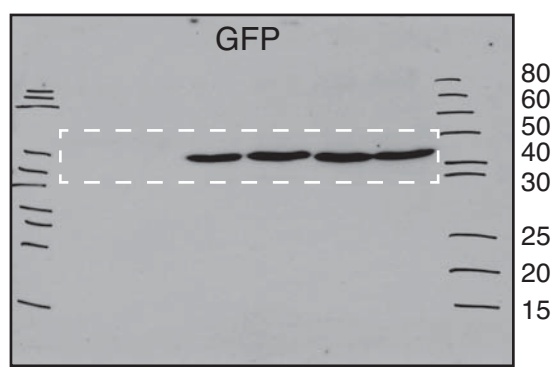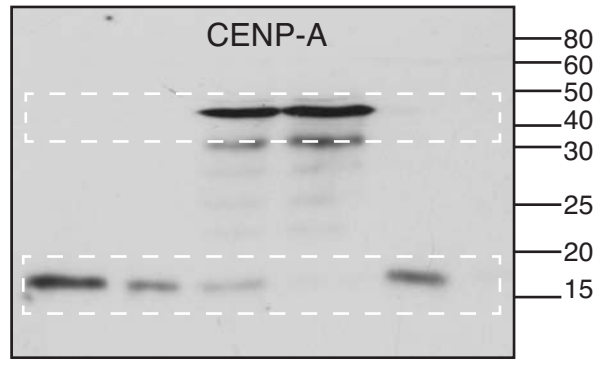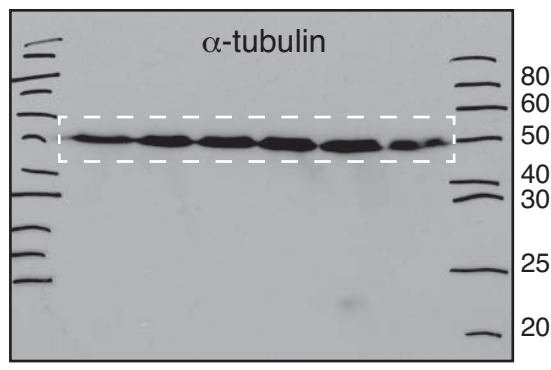

Figure 5c

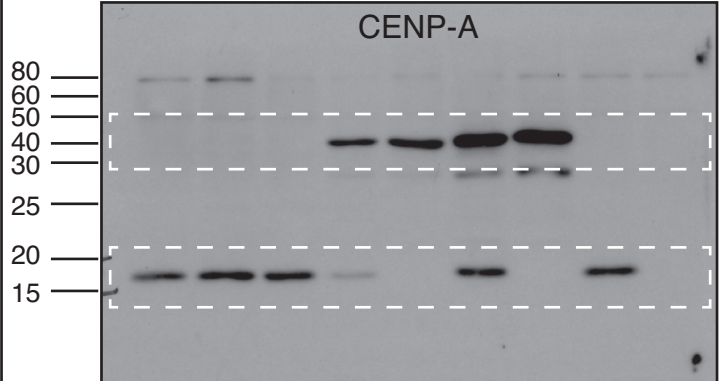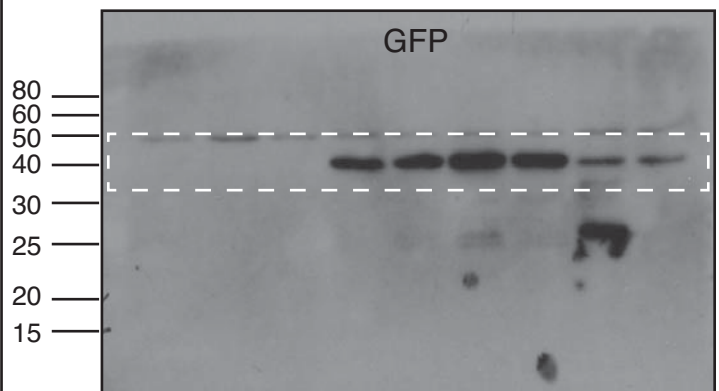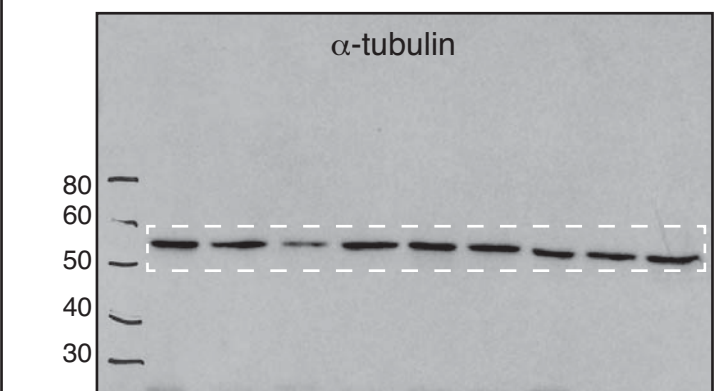

Figure 4d

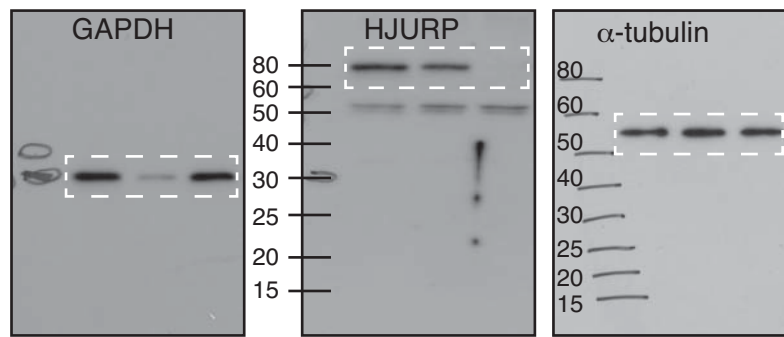

Figure 6b

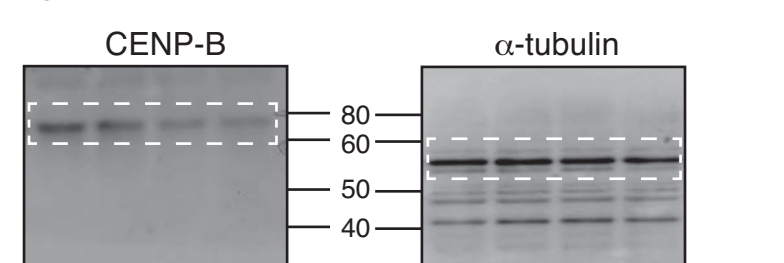

Supplement: NIHMS681435-supplement-Supplemental_Figures.pdf [file NIHMS681435-supplement-Supplemental_Figures.pdf]
